# Supplementary material
Source: PubMed Central journal article supplement (PMC5915212)
Supplement: Supp_Data.pdf [file Supp_Data.pdf]

## Supplementary Data

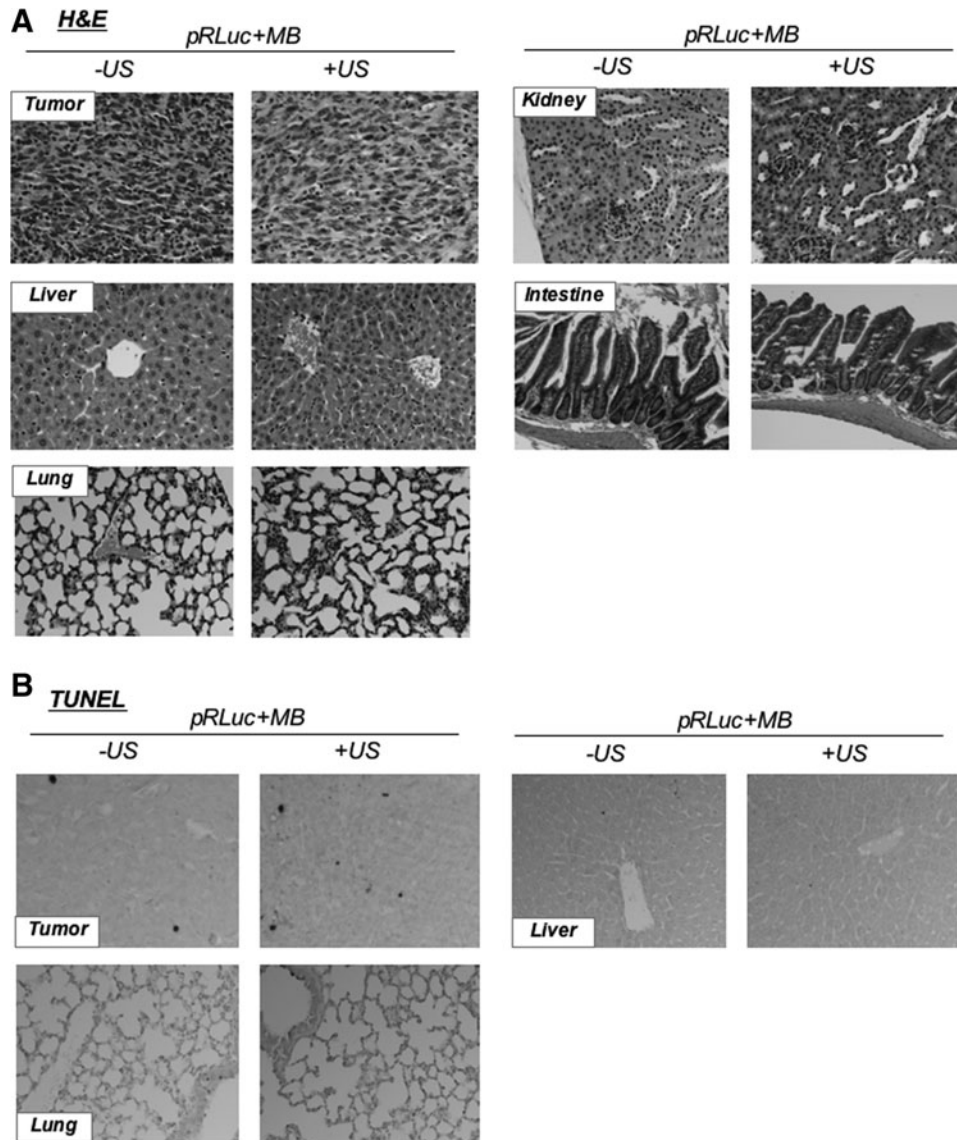

**SUPPLEMENTARY FIG. S1.** Histology examination of sonoporated tumors or tissues. **(A)** Hematoxylin and eosin (H&E) staining of sonoporated RM1 prostate tumors or surrounding tissues does not show any apparent pathological changes as a result of sonoporation under the conditions tested. Magnification, 200 $\times$ . **(B)** TUNEL staining with methyl green counterstain of sonoporated RM1 tumors or surrounding tissues does not show any apparent increases in cellular apoptosis or necrosis as a result of sonoporation under the conditions tested. TUNEL-positive cells stain brown. Magnification, 200 $\times$ .

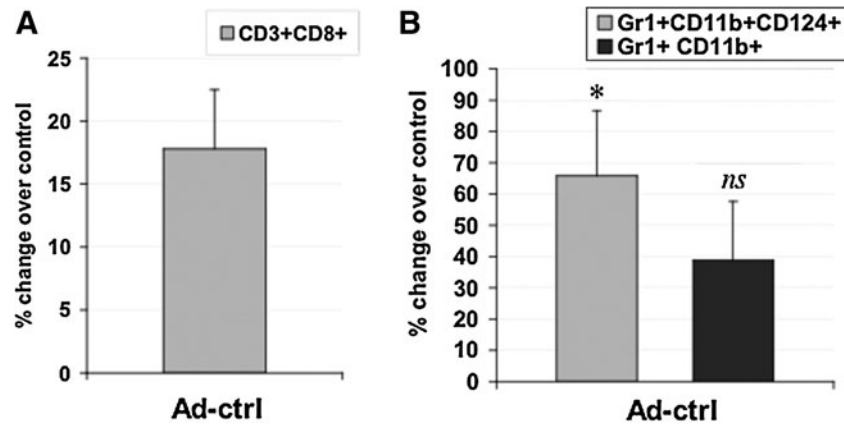

**SUPPLEMENTARY FIG. S2.** Effects of Ad control vector on immune cell populations isolated from TRAMP-C2 tumors. **(A)** Adenoviral control vector Ad-ctrl (Ad-GFP) as a trend increased the numbers of CD3<sup>+</sup>CD8<sup>+</sup> immune effectors in tumors compared with the sonoporation control group (pORF empty pDNA+MB+US), but this difference was not significant ( $p=0.13$ ). *ns*, not significant with  $p>0.05$ . **(B)** Ad-ctrl enhances MDSC population numbers within treated tumors compared with the sonoporation control group. A population with markers Gr1<sup>+</sup>CD11b<sup>+</sup>CD124<sup>+</sup> was significantly enhanced ( $p<0.04$ ) by Ad-ctrl treatment; for a population with Gr1<sup>+</sup>CD11b<sup>+</sup> markers, however, there was a trend of enhanced numbers, but this was not significant ( $p=0.07$ ). \* $p<0.05$ ; *ns*, not significant with  $p>0.05$ ).
